# Supplementary material
Source: publisher figshare collection journal article supplement (https://acs.figshare.com/ndownloader/files/25490668)
Supplement: Supplementary file 1 [file 25490668]

## Supporting information

### Lithium ion conduction in a cation deficient quadruple perovskite $\text{LiCuTa}_3\text{O}_9$ epitaxial thin film: theoretical and experimental investigations

Kotaro Ohashi<sup>†</sup>, Kei Shigematsu<sup>\*†</sup>, Hena Das<sup>\*†,‡</sup>, Kazumasa Yamamoto<sup>†</sup>, Hirofumi Tsukasaki<sup>||</sup>, Shigeo Mori<sup>||</sup> and Masaki Azuma<sup>†</sup>

<sup>†</sup>Laboratory for Materials and Structures, Institute of Innovative Research, Tokyo Institute of Technology, 4259 Nagatsuta, Midori-ku, Yokohama, Kanagawa 226-8503, Japan

<sup>‡</sup>Tokyo Tech World Research Hub Initiative (WRHI), Institute of Innovative Research, Tokyo Institute of Technology, 4259 Nagatsuta, Midori-ku, Yokohama, Kanagawa 226-8503, Japan

<sup>||</sup>Department of Materials Science, Osaka Prefecture University, 1-2, Gakuen-cho, Naka-ku, Sakai, Osaka 599-8570, Japan

<sup>\*</sup>Kanagawa Institute of Industrial Science and Technology (KISTEC), 705-1 Shimoimaizumi, Ebina, Kanagawa 243-0435, Japan

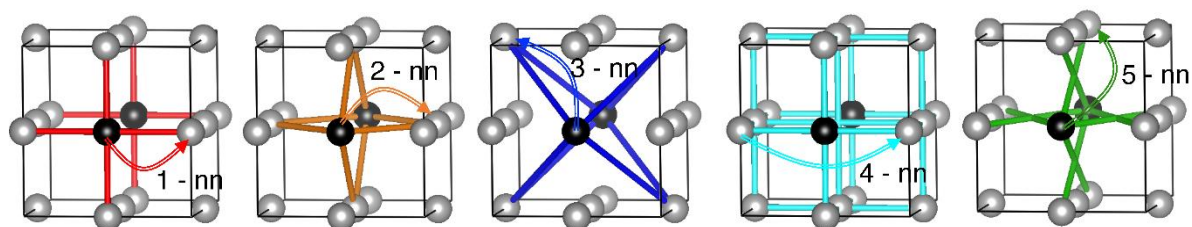

Figure S1. illustrate the nn shell around one of the A' sites which is denoted by black sphere.

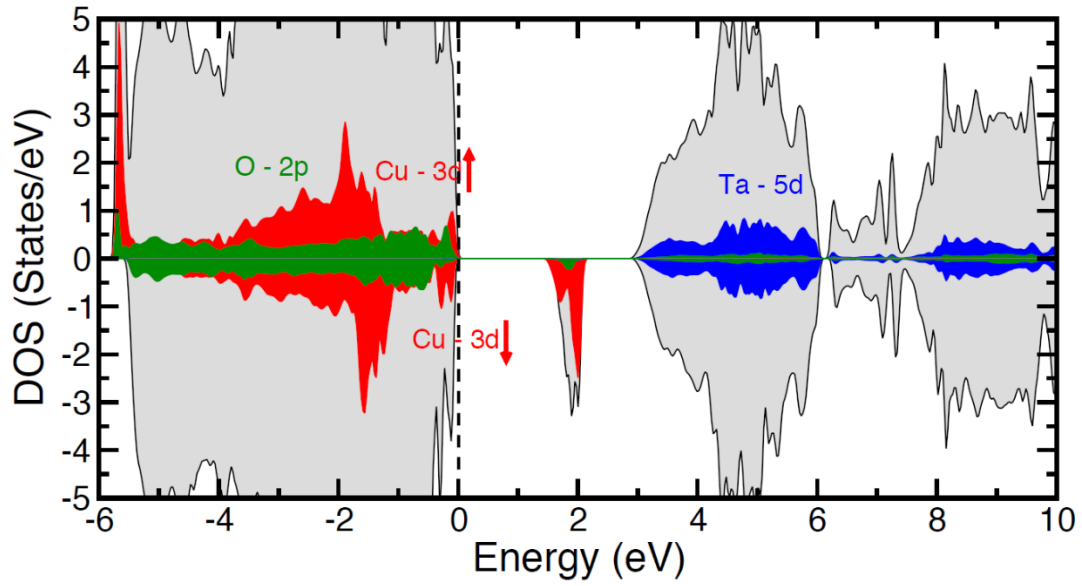

Figure S2. Calculated density of states (DOS) using DFT+ $U$  method for the most stable cation ordered structure of  $\text{LiCuTa}_3\text{O}_9$ .

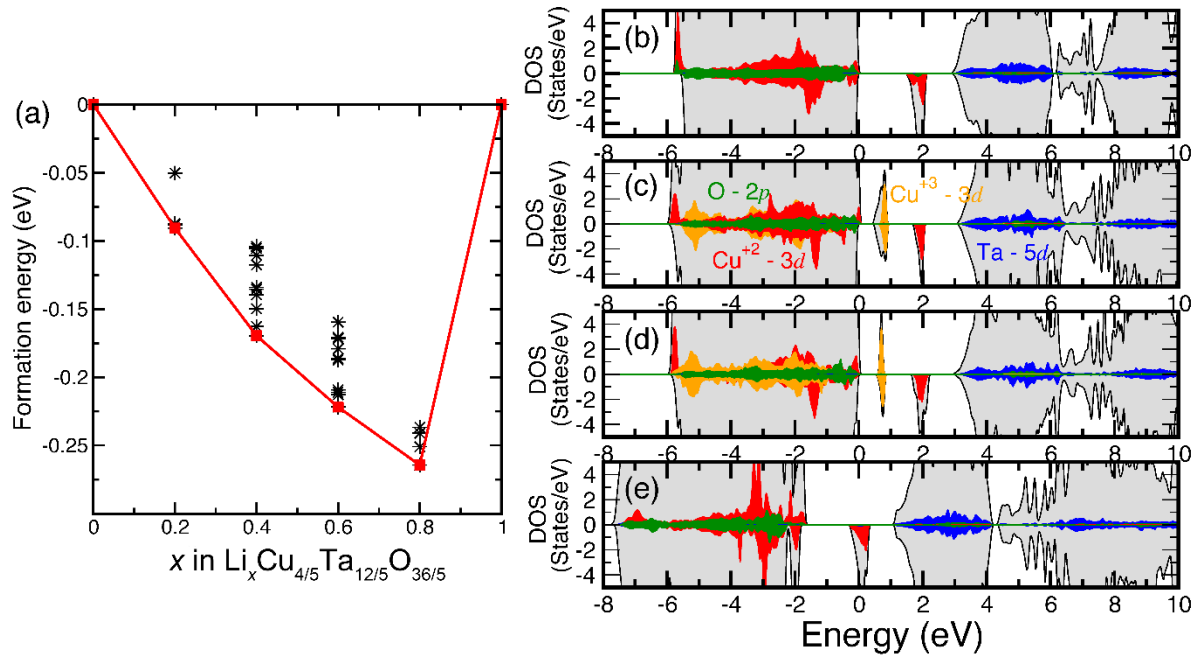

Figure S3. (a) calculated formation energy as a function of Li concentration. (b)-(e) calculated density of states (DOS) of  $\text{Li}_4\text{Cu}_4\text{Ta}_{12}\text{O}_{36}$ ,  $\text{Li}_2\text{Cu}_4\text{Ta}_{12}\text{O}_{36}$ ,  $\text{Li}_3\text{Cu}_4\text{Ta}_{12}\text{O}_{36}$  and  $\text{Li}_5\text{Cu}_4\text{Ta}_{12}\text{O}_{36}$  compositions. These DOS were calculated for the respective lowest energy structures. These DOS were calculated using an effective  $U$  value of 4.0 eV and 2.0 eV at the Cu 3d and Ta 5d states, respectively.

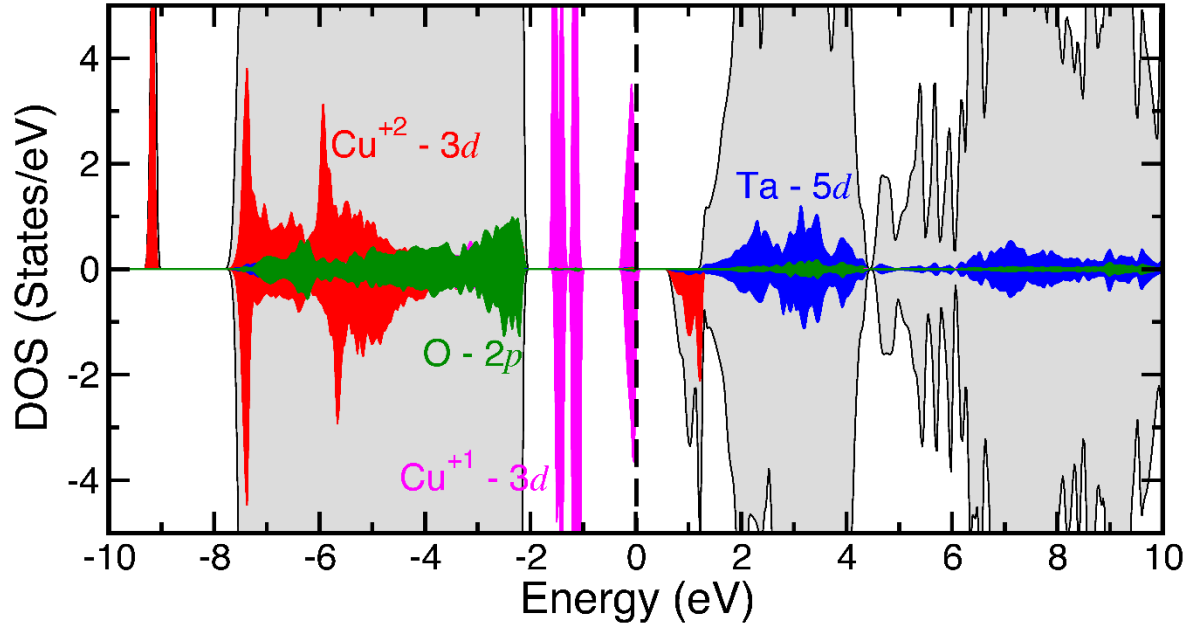

Figure S4. calculated DOS of  $\text{Li}_5\text{Cu}_4\text{Ta}_{12}\text{O}_{36}$  composition using an effective  $U$  value of 7.0 eV at the Cu 3d state.

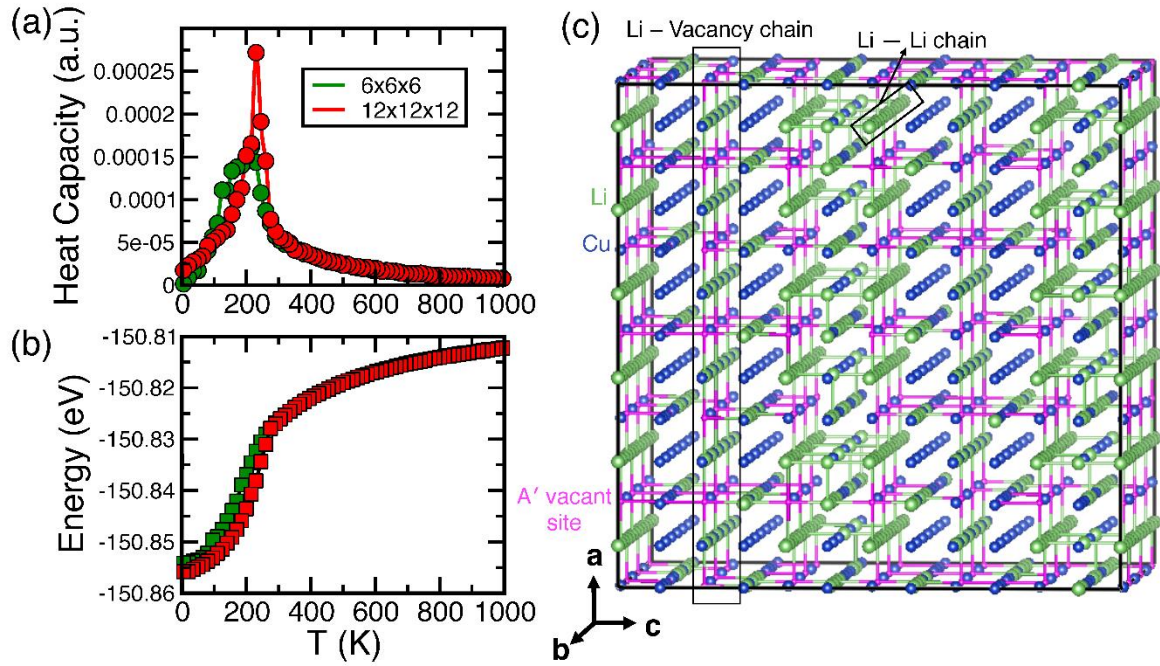

Figure S5. (a) and (b) Calculated specific heat and formation energy as a function of temperature using Monte Carlo method. We show the data calculated with 6x6x6 (648 sites) and 12x12x12 (5184 sites) cell size. We also cross-checked the observed phase transition using  $15 \times 15 \times 15$  (10125  $A'$  sites) cell size which also show the phase transition at  $\sim 215$  K. (c) The structure stabilized at 20 K which shows the key cation ordered features such as, the formation of Li - A'-site vacancy -Li and Li - Li chains, the key features which were also observed in the *Imm2* structure.

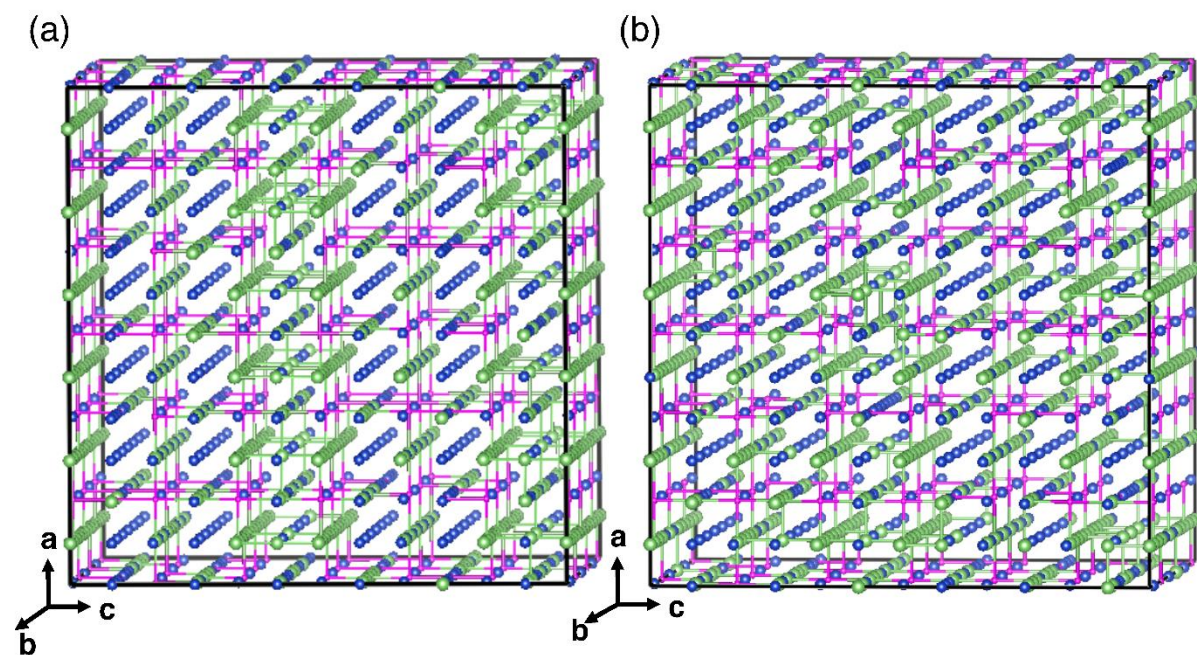

Figure S6. (a) and (b) Structures stabilized at 50 K and 110 K, respectively.
